# Supplementary material
Source: Copernicus journal article supplement (doi:10.5194/egusphere-2026-1689)
Supplement: Supplementary file 1 [file egusphere-2026-1689-supplement.pdf]

# Why multitemporal ALS forest metrics remain challenging: Insights from operational airborne laser scanning

Charis Moana Gretler<sup>a, \*</sup>, Daniel Kükenbrink<sup>a, \*</sup>, Mauro Marty<sup>a</sup>, Christian Ginzler<sup>a</sup>, Felix Morsdorf<sup>b</sup>

<sup>a</sup> Landchange Science, Swiss Federal Institute WSL, Zürcherstrasse 111, Birmensdorf, CH-8903, Switzerland

<sup>b</sup> Remote Sensing Laboratories, Department of Geography, University of Zurich, CH-8057 Zurich, Switzerland

\* *Correspondence to:* Charis Moana Gretler ([charis.gretler@wsl.ch](mailto:charis.gretler@wsl.ch)) and Daniel Kükenbrink ([daniel.kuekenbrink@wsl.ch](mailto:daniel.kuekenbrink@wsl.ch))

## Supplementary Material

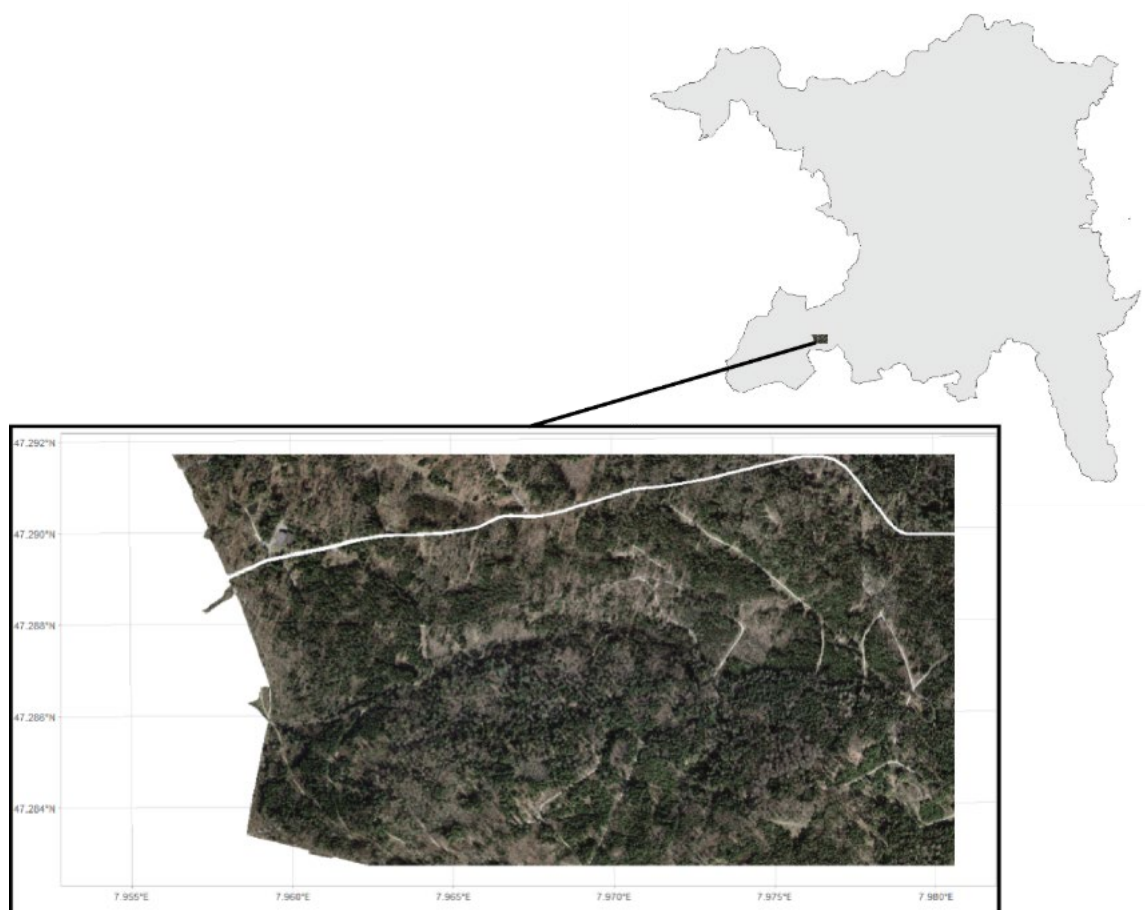

**Figure S1.** Forest used for the sensitivity analysis and its location in the Canton Aargau. (Federal Office of Topography swisstopo, 2022)

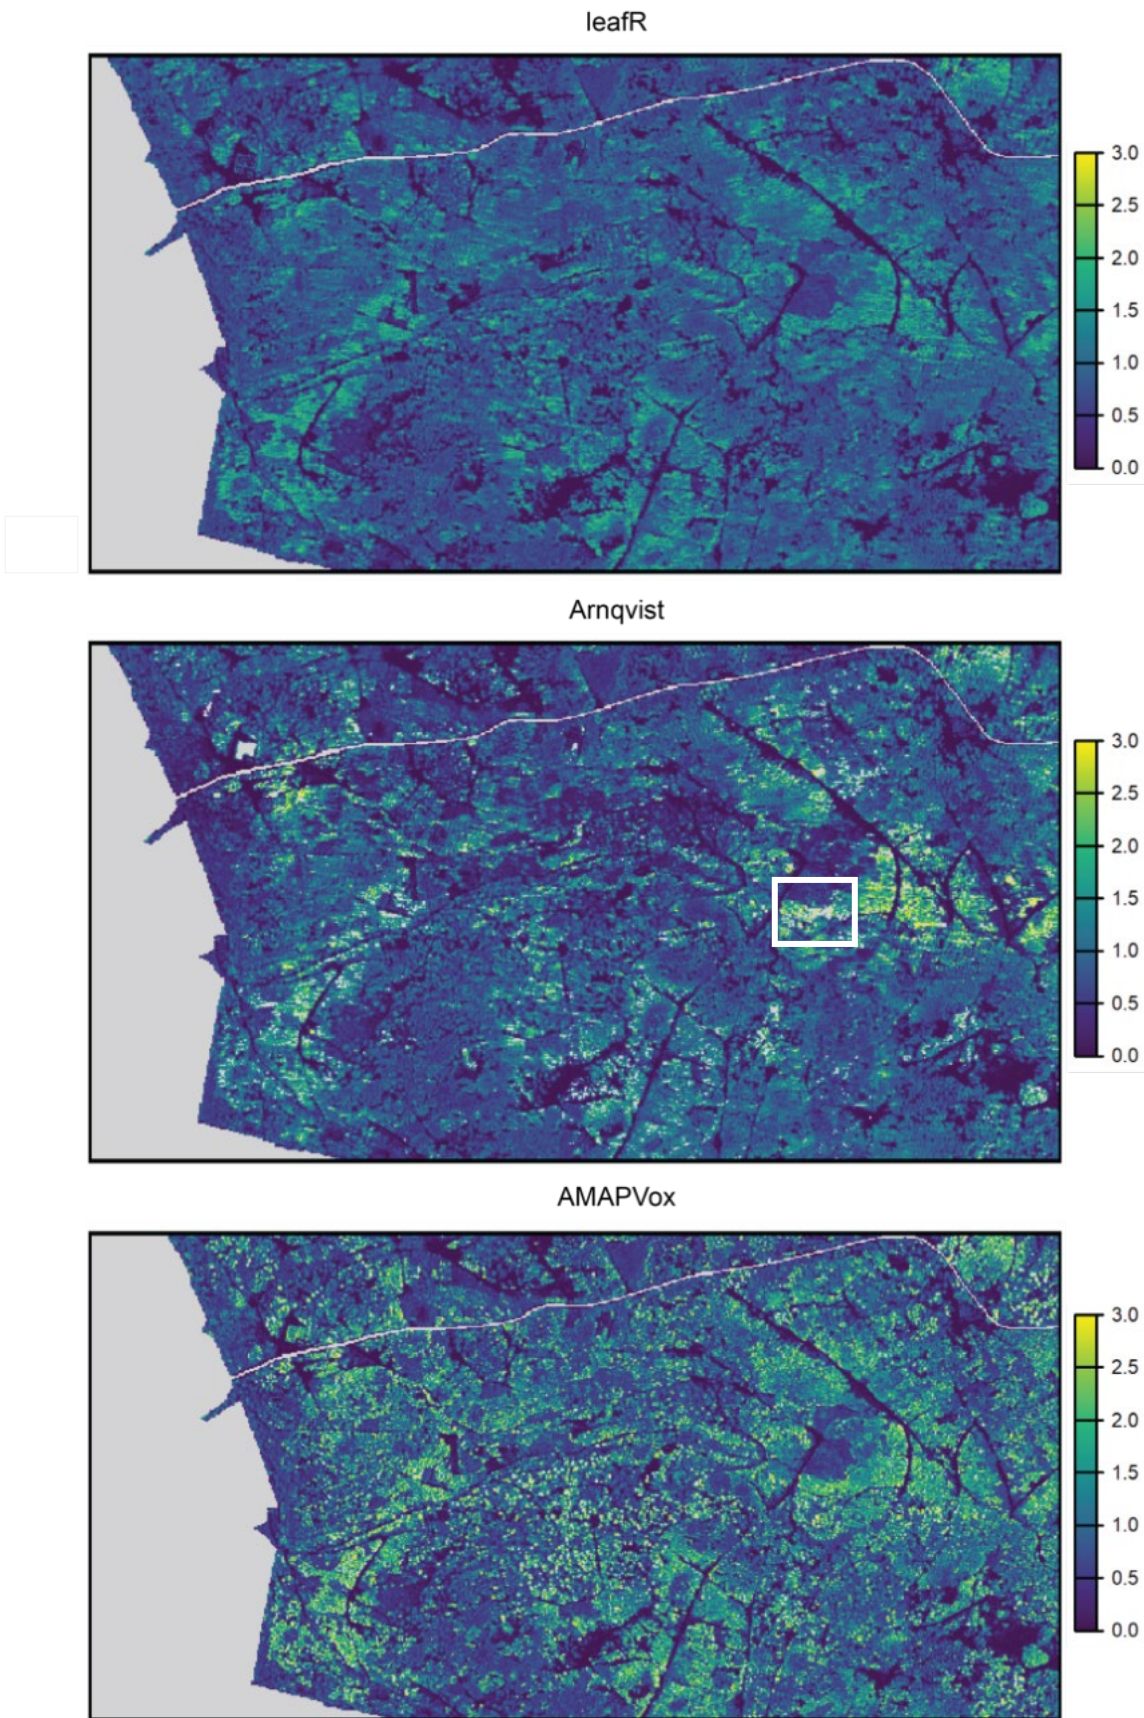

5

**Figure S2.** Outputs of the three PAI estimation methods in the forest used for the sensitivity analysis (see Figure S1). In dense forest areas (see white square), no values (=grey pixels) were estimated using the Arnqvist method due to the lack of ground points.

10 **Overview of test areas****Table S1.** List of different test areas used in the study, including their exact use.

|                              | <b>Area [km<sup>2</sup>]</b> | <b>Usage</b>                                                   | <b>Notes</b>                                                                                |
|------------------------------|------------------------------|----------------------------------------------------------------|---------------------------------------------------------------------------------------------|
| <b>Total CH test area</b>    | 144.9                        | CH (H95 and Hmax)                                              |                                                                                             |
| <b>Total PAI test area</b>   | 56.1                         | PAI leafR<br>PAI Arnqvist<br>PAI AMAPVox                       |                                                                                             |
| <b>Reference forest</b>      | 2.2                          | Comparison between the different PAI estimation methods.       | The reference forest consists of multiple isolated pixels distributed over the entire area. |
| <b>Sensitivity test area</b> | 1.7                          | Forest patch used for the sensitivity analysis (see Figure S1) |                                                                                             |

## Statistical analysis of interannual consistency

### Summary for CH

15 **Table S2.** Summary of paired Wilcoxon signed-rank and Kolmogorov–Smirnov test results for canopy height (CH) across all interannual comparisons (2014–2019, 2014–2020 and 2019–2020). Reported values include median and interquartile range (IQR) of pixel-wise differences, Wilcoxon test statistics, and Kolmogorov–Smirnov D statistics.

| Comparison          | Median_diff | IQR_diff | Wilcox_W | Wilcox_p | KS_D  | KS_p |
|---------------------|-------------|----------|----------|----------|-------|------|
| <b>2014 vs 2019</b> | 0.92        | 2.52     | 1.53E+14 | 0        | 0.013 | 0    |
| <b>2014 vs 2020</b> | 1.14        | 2.99     | 1.6E+14  | 0        | 0.013 | 0    |
| <b>2019 vs 2020</b> | 0.13        | 0.68     | 1.71E+14 | 0        | 0.006 | 0    |

### Summary for PAI: leafR, Arnqvist, AMAPVox

20 **Table S3.** Summary of paired Wilcoxon signed-rank and Kolmogorov–Smirnov test results for PAI (leafR) across all interannual comparisons (2014–2019, 2014–2020 and 2019–2020). Reported values include median and interquartile range (IQR) of pixel-wise differences, Wilcoxon test statistics, and Kolmogorov–Smirnov D statistics.

| Comparison          | Median_diff | IQR_diff | Wilcox_W | Wilcox_p | KS_D  | KS_p   |
|---------------------|-------------|----------|----------|----------|-------|--------|
| <b>2014 vs 2019</b> | -0.251      | 0.627    | 4.83E+14 | <0.001   | 0.234 | <0.001 |
| <b>2014 vs 2020</b> | 0.104       | 0.675    | 2.62E+14 | <0.001   | 0.070 | <0.001 |
| <b>2019 vs 2020</b> | 0.347       | 0.473    | 7.54E+13 | <0.001   | 0.282 | <0.001 |

25 **Table S4.** Summary of paired Wilcoxon signed-rank and Kolmogorov–Smirnov test results for PAI (Arnqvist) across all interannual comparisons (2014–2019, 2014–2020 and 2019–2020). Reported values include median and interquartile range (IQR) of pixel-wise differences, Wilcoxon test statistics, and Kolmogorov–Smirnov D statistics.

| Comparison          | Median_diff | IQR_diff | Wilcox_W | Wilcox_p | KS_D  | KS_p   |
|---------------------|-------------|----------|----------|----------|-------|--------|
| <b>2014 vs 2019</b> | -0.450      | 1.117    | 4.35E+14 | <0.001   | 0.223 | <0.001 |
| <b>2014 vs 2020</b> | 0.244       | 1.065    | 2.1E+14  | <0.001   | 0.069 | <0.001 |
| <b>2019 vs 2020</b> | 0.670       | 0.943    | 7.88E+13 | <0.001   | 0.282 | <0.001 |

30 **Table S5.** Summary of paired Wilcoxon signed-rank and Kolmogorov–Smirnov test results for PAI (AMAPVox) across all interannual comparisons (2014–2019, 2014–2020 and 2019–2020). Reported values include median and interquartile range (IQR) of pixel-wise differences, Wilcoxon test statistics, and Kolmogorov–Smirnov D statistics.

| Comparison          | Median_diff | IQR_diff | Wilcox_W | Wilcox_p | KS_D  | KS_p   |
|---------------------|-------------|----------|----------|----------|-------|--------|
| <b>2014 vs 2019</b> | -0.263      | 1.758    | 5.65E+13 | <0.001   | 0.159 | <0.001 |
| <b>2014 vs 2020</b> | 0.275       | 1.719    | 3.66E+13 | <0.001   | 0.032 | <0.001 |
| <b>2019 vs 2020</b> | 0.564       | 1.195    | 2.22E+13 | <0.001   | 0.187 | <0.001 |

Summary for PAI: forest classes and reference forest

35 **Table S6.** Summary of paired Wilcoxon signed-rank and Kolmogorov–Smirnov test results for PAI (**leafR**) across all interannual comparisons (2014–2019, 2014–2020 and 2019–2020) and forest classes including reference forest (con = coniferous forest, mix\_con = mixed coniferous forest, mix\_dec = mixed deciduous forest, dec = deciduous forest, ref\_forest = reference forest). Reported values include median and interquartile range (IQR) of pixel-wise differences, Wilcoxon test statistics, and Kolmogorov–Smirnov D statistics.

| ForestClass | Comparison   | Median_diff | IQR_diff | Wilcox_W    | Wilcox_p | KS_D  | KS_p   |
|-------------|--------------|-------------|----------|-------------|----------|-------|--------|
| con         | 2014 vs 2019 | -0.156      | 1.623    | 5.98707E+12 | <0.001   | 0.083 | <0.001 |
| con         | 2014 vs 2020 | 0.147       | 1.635    | 4.79862E+12 | <0.001   | 0.016 | <0.001 |
| con         | 2019 vs 2020 | 0.279       | 1.153    | 3.64163E+12 | <0.001   | 0.095 | <0.001 |
| mix_con     | 2014 vs 2019 | -0.291      | 1.413    | 9.65693E+12 | <0.001   | 0.140 | <0.001 |
| mix_con     | 2014 vs 2020 | 0.180       | 1.428    | 6.46779E+12 | <0.001   | 0.024 | <0.001 |
| mix_con     | 2019 vs 2020 | 0.426       | 0.999    | 3.58087E+12 | <0.001   | 0.152 | <0.001 |
| mix_dec     | 2014 vs 2019 | -0.436      | 1.157    | 3.37233E+13 | <0.001   | 0.221 | <0.001 |
| mix_dec     | 2014 vs 2020 | 0.240       | 1.127    | 1.68979E+13 | <0.001   | 0.055 | <0.001 |
| mix_dec     | 2019 vs 2020 | 0.641       | 0.923    | 5.56613E+12 | <0.001   | 0.266 | <0.001 |
| dec         | 2014 vs 2019 | -0.552      | 0.886    | 8.62596E+13 | <0.001   | 0.316 | <0.001 |
| dec         | 2014 vs 2020 | 0.296       | 0.854    | 2.64932E+13 | <0.001   | 0.127 | <0.001 |
| dec         | 2019 vs 2020 | 0.851       | 0.731    | 4.24017E+12 | <0.001   | 0.432 | <0.001 |
| ref_forest  | 2014 vs 2019 | -0.069      | 0.988    | 10914891488 | <0.001   | 0.059 | <0.001 |
| ref_forest  | 2014 vs 2020 | 0.128       | 1.006    | 8261595940  | <0.001   | 0.070 | <0.001 |
| ref_forest  | 2019 vs 2020 | 0.205       | 0.682    | 6307103155  | <0.001   | 0.127 | <0.001 |

40 **Table S7.** Summary of paired Wilcoxon signed-rank and Kolmogorov–Smirnov test results for PAI (**Arngvist**) across all interannual comparisons (2014–2019, 2014–2020 and 2019–2020) and forest classes including reference forest (con = coniferous forest, mix\_con = mixed coniferous forest, mix\_dec = mixed deciduous forest, dec = deciduous forest, ref\_forest = reference forest). Reported values include median and interquartile range (IQR) of pixel-wise differences, Wilcoxon test statistics, and Kolmogorov–Smirnov D statistics.

| ForestClass | Comparison   | Median_diff | IQR_diff | Wilcox_W    | Wilcox_p | KS_D  | KS_p   |
|-------------|--------------|-------------|----------|-------------|----------|-------|--------|
| con         | 2014 vs 2019 | -0.156      | 1.623    | 5.98707E+12 | <0.001   | 0.083 | <0.001 |
| con         | 2014 vs 2020 | 0.147       | 1.635    | 4.79862E+12 | <0.001   | 0.016 | <0.001 |
| con         | 2019 vs 2020 | 0.279       | 1.153    | 3.64163E+12 | <0.001   | 0.095 | <0.001 |
| mix_con     | 2014 vs 2019 | -0.291      | 1.413    | 9.65693E+12 | <0.001   | 0.140 | <0.001 |
| mix_con     | 2014 vs 2020 | 0.180       | 1.428    | 6.46779E+12 | <0.001   | 0.024 | <0.001 |
| mix_con     | 2019 vs 2020 | 0.426       | 0.999    | 3.58087E+12 | <0.001   | 0.152 | <0.001 |
| mix_dec     | 2014 vs 2019 | -0.436      | 1.157    | 3.37233E+13 | <0.001   | 0.221 | <0.001 |
| mix_dec     | 2014 vs 2020 | 0.240       | 1.127    | 1.68979E+13 | <0.001   | 0.055 | <0.001 |
| mix_dec     | 2019 vs 2020 | 0.641       | 0.923    | 5.56613E+12 | <0.001   | 0.266 | <0.001 |
| dec         | 2014 vs 2019 | -0.552      | 0.886    | 8.62596E+13 | <0.001   | 0.316 | <0.001 |
| dec         | 2014 vs 2020 | 0.296       | 0.854    | 2.64932E+13 | <0.001   | 0.127 | <0.001 |
| dec         | 2019 vs 2020 | 0.851       | 0.731    | 4.24017E+12 | <0.001   | 0.432 | <0.001 |
| ref_forest  | 2014 vs 2019 | -0.043      | 1.662    | 6224539151  | <0.001   | 0.046 | <0.001 |
| ref_forest  | 2014 vs 2020 | 0.325       | 1.529    | 4443584968  | <0.001   | 0.095 | <0.001 |
| ref_forest  | 2019 vs 2020 | 0.338       | 1.331    | 4232206256  | <0.001   | 0.126 | <0.001 |

**Table S8.** Summary of paired Wilcoxon signed-rank and Kolmogorov–Smirnov test results for PAI (**AMAPVox**) across all interannual comparisons (2014–2019, 2014–2020 and 2019–2020) and forest classes including reference forest (con = coniferous forest, mix\_con = mixed coniferous forest, mix\_dec = mixed deciduous forest, dec = deciduous forest, ref\_forest = reference forest). Reported values include median and interquartile range (IQR) of pixel-wise differences, Wilcoxon test statistics, and Kolmogorov–Smirnov D statistics.

| ForestClass | Comparison   | Median_diff | IQR_diff | Wilcox_W    | Wilcox_p | KS_D  | KS_p   |
|-------------|--------------|-------------|----------|-------------|----------|-------|--------|
| con         | 2014 vs 2019 | -0.156      | 1.623    | 5.98707E+12 | <0.001   | 0.083 | <0.001 |
| con         | 2014 vs 2020 | 0.147       | 1.635    | 4.79862E+12 | <0.001   | 0.016 | <0.001 |
| con         | 2019 vs 2020 | 0.279       | 1.153    | 3.64163E+12 | <0.001   | 0.095 | <0.001 |
| mix_con     | 2014 vs 2019 | -0.291      | 1.413    | 9.65693E+12 | <0.001   | 0.140 | <0.001 |
| mix_con     | 2014 vs 2020 | 0.180       | 1.428    | 6.46779E+12 | <0.001   | 0.024 | <0.001 |
| mix_con     | 2019 vs 2020 | 0.426       | 0.999    | 3.58087E+12 | <0.001   | 0.152 | <0.001 |
| mix_dec     | 2014 vs 2019 | -0.436      | 1.157    | 3.37233E+13 | <0.001   | 0.221 | <0.001 |
| mix_dec     | 2014 vs 2020 | 0.240       | 1.127    | 1.68979E+13 | <0.001   | 0.055 | <0.001 |
| mix_dec     | 2019 vs 2020 | 0.641       | 0.923    | 5.56613E+12 | <0.001   | 0.266 | <0.001 |
| dec         | 2014 vs 2019 | -0.552      | 0.886    | 8.62596E+13 | <0.001   | 0.316 | <0.001 |
| dec         | 2014 vs 2020 | 0.296       | 0.854    | 2.64932E+13 | <0.001   | 0.127 | <0.001 |
| dec         | 2019 vs 2020 | 0.851       | 0.731    | 4.24017E+12 | <0.001   | 0.432 | <0.001 |
| ref_forest  | 2014 vs 2019 | 0.270       | 2.710    | 4460829642  | <0.001   | 0.056 | <0.001 |
| ref_forest  | 2014 vs 2020 | 0.561       | 2.916    | 3730766504  | <0.001   | 0.074 | <0.001 |
| ref_forest  | 2019 vs 2020 | 0.307       | 2.005    | 4357924009  | <0.001   | 0.037 | <0.001 |
